# Supplementary material for: Dystrophin conferral using human endothelium expressing HLA-E in the non-immunosuppressive murine model of Duchenne muscular dystrophy
Source: PubMed Central journal article supplement — Hum Mol Genet. 2010 Oct 14;20(2):235–44. doi: 10.1093/hmg/ddq458 (PMC3005899; doi:10.1093/hmg/ddq458), 2010-10-14
Supplement: supp_ddq458_ddq458supp_table.pdf [file supp_ddq458_ddq458supp_table.pdf]

**Table S1. RT-PCR primer sequence and product size**

| Gene product          | Primer sequence          |                         | Amplicon size (bp) |
|-----------------------|--------------------------|-------------------------|--------------------|
|                       | Forward                  | Reverse                 |                    |
| <i>CD31</i>           | GACGTGCTGTTTTACAACATCTC  | CCTCACGATCCCACCTTGG     | 213                |
| <i>PDGFB</i>          | CCAGGTGAGAAAGATCGAGATTG  | ATGCGTGTGCTTGAATTTCCG   | 238                |
| <i>VEGFR-1 (FLT1)</i> | AGCACGCTGTTTATTGAAAAGAGT | CCAGATTAGACTTGTCCGAGGTT | 133                |
| <i>VEGFR-2 (FLK1)</i> | AGTGATCGGAAATGACACTGGA   | GCACAAAGTGACACGTTGAGAT  | 213                |
| <i>ANGPT1</i>         | ACGATGGCAACTGTCGTGAG     | TCCGACTTCATGTTTTCCACAA  | 184                |
| <i>ANGPT2</i>         | CGCCGCTCGAATACGATGA      | CGTCTGGTTCTGTACTGCATT   | 158                |
| <i>TIE-2</i>          | TGCCACCCTGGTTTTTACGG     | TTGGAAGCGATCACACATCTC   | 78                 |
| <i>alpha-SMA</i>      | CGGTGCTGTCTCTCTATGCC     | CACGCTCAGTCAGGATCTTCA   | 177                |
| <i>GAPDH</i>          | GCTCAGACACCATGGGGAAGGT   | GTGGTGCAGGAGGCATTGCTGA  | 474                |
| <i>Myf5</i>           | TGAGAGAGCAGGTGGAGAACTAC  | GCCTTCTTCGTCTGTGTATTAG  | 417                |
| <i>Myogenin</i>       | GCCACAGATGCCACTACTTC     | CAACTTCAGCACAGGAGACC    | 565                |
| <i>Desmin</i>         | CCTACTCTGCCCTCAACTTC     | AGTATCCCAACACCCTGCTC    | 519                |
| <i>MyHC-IIx/d</i>     | ATAGGAACACCCAAGCCATC     | TTTGCGTAGACCCTTGACAG    | 599                |
| <i>18S</i>            | GTGGAGCGATTGTCTGGTT      | CGCTGAGCCAGTCAGTGTAG    | 200                |
